# Supplementary material for: Controllable La Deficiency Engineering within Perovskite Oxides for Enhanced Overall Water Splitting
Source: MDPI journal article supplement (doi:10.3390/molecules29061342), 2024-03-18
Supplement: s1 [file s1]

# **Supporting Information**

## **Controllable La deficiency engineering within perovskite oxides for enhanced overall water splitting**

Xiaohu Xu <sup>1\*†</sup>, Kaiwei Guo <sup>1†</sup>, Xinyue Yu <sup>1\*</sup>

<sup>1</sup> College of Physics and Information Engineering, Shanxi Normal University, No.339  
Taiyu road, Xiaodian District, Taiyuan 030031, China; bigbrowm@163.com (X.H.X),  
ewe32e3@163.com (K.W.G), yuxinyue9907@163.com (X.Y.Y);

<sup>†</sup> These authors contributed equally to this work.

\* Author to whom correspondence should be addressed; bigbrowm@163.com (X.H.X);  
yuxinyue9907@163.com (X.Y.Y).

Number of pages: 25

Number of figures: 19

Number of tables: 4

## Content

|                                                                              |                   |
|------------------------------------------------------------------------------|-------------------|
| Overall XPS survey spectra .....                                             | <b>Figure S1</b>  |
| LSV curves of various catalysts with different hydrothermal temperature. ... | <b>Figure S2</b>  |
| LSV curves of various catalysts with different Co/Fe ratio .....             | <b>Figure S3</b>  |
| LSV curves of <b>LaCoFe/NF</b> and <b>LaCoFe/NFF</b> . ....                  | <b>Figure S4</b>  |
| Cyclic voltammograms with different scanning rate for HER .....              | <b>Figure S5</b>  |
| Electrochemical active area (ECSA) of HER .....                              | <b>Figure S6</b>  |
| Reduction peaks recorded at $0.2 \text{ V s}^{-1}$ . ....                    | <b>Figure S7</b>  |
| TOF curves and TOF values at the overpotential of 200 mV .....               | <b>Figure S8</b>  |
| BET surface area calculations and specific activity .....                    | <b>Figure S9</b>  |
| <b>Chronopotentiometry test for HER.....</b>                                 | <b>Figure S10</b> |
| SEM images after long-term HER tests.....                                    | <b>Figure S11</b> |
| XPS spectra after long-term HER tests.....                                   | <b>Figure S12</b> |
| Cyclic voltammograms with different scanning rate for OER .....              | <b>Figure S13</b> |
| Electrochemical active area (ECSA) of OER .....                              | <b>Figure S14</b> |
| TOF curves and TOF values at the overpotential of 300 mV .....               | <b>Figure S15</b> |
| Specific activity.....                                                       | <b>Figure S16</b> |
| <b>Chronopotentiometry test for OER.....</b>                                 | <b>Figure S17</b> |
| SEM images after long-term OER tests.....                                    | <b>Figure S18</b> |
| XPS spectra after long-term OER tests.....                                   | <b>Figure S19</b> |
| XPS Peak Positions.....                                                      | <b>Table S1</b>   |
| Comparison of HER performance and Tafel .....                                | <b>Table S2</b>   |
| Comparison of OER performance. ....                                          | <b>Table S3</b>   |
| Comparison of Cell voltage .....                                             | <b>Table S4</b>   |

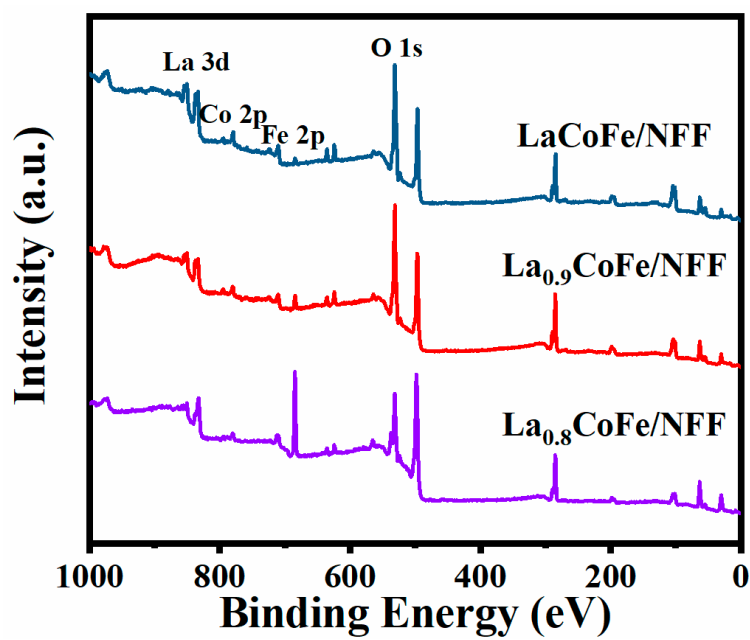

**Figure S1.** Overall XPS survey spectra of **LaCoFe/NFF**, **La<sub>0.9</sub>CoFe/NFF** and **La<sub>0.8</sub>CoFe/NFF**.

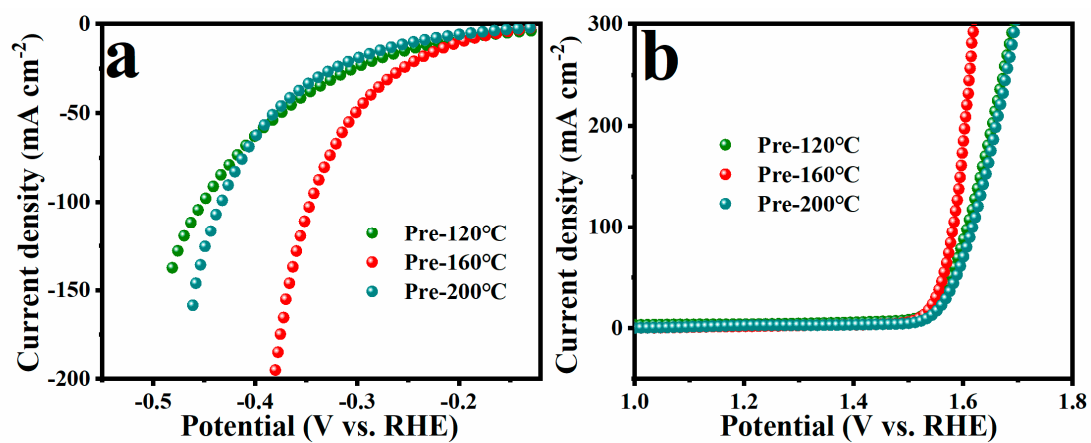

**Figure S2.** LSV curves of LaCoFe/NFF catalysts with different hydrothermal temperature in 1 M KOH solution for (a) HER and (b) OER.

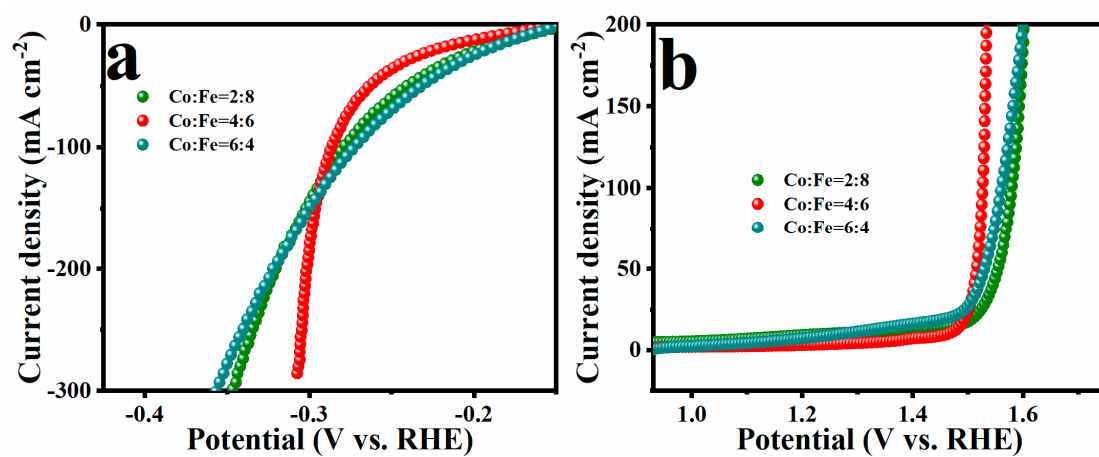

**Figure S3.** LSV curves of various catalysts with different Co/Fe ratio in 1 M KOH solution for (a) HER and (b) OER.

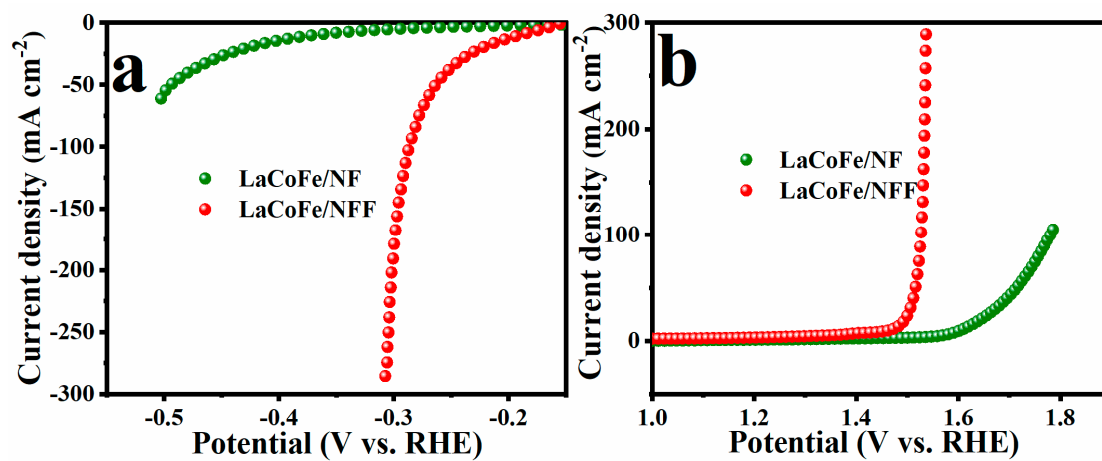

**Figure S4.** LSV curves of LaCoFe/NF and LaCoFe/NFF in 1 M KOH solution for (a) HER and (b) OER.

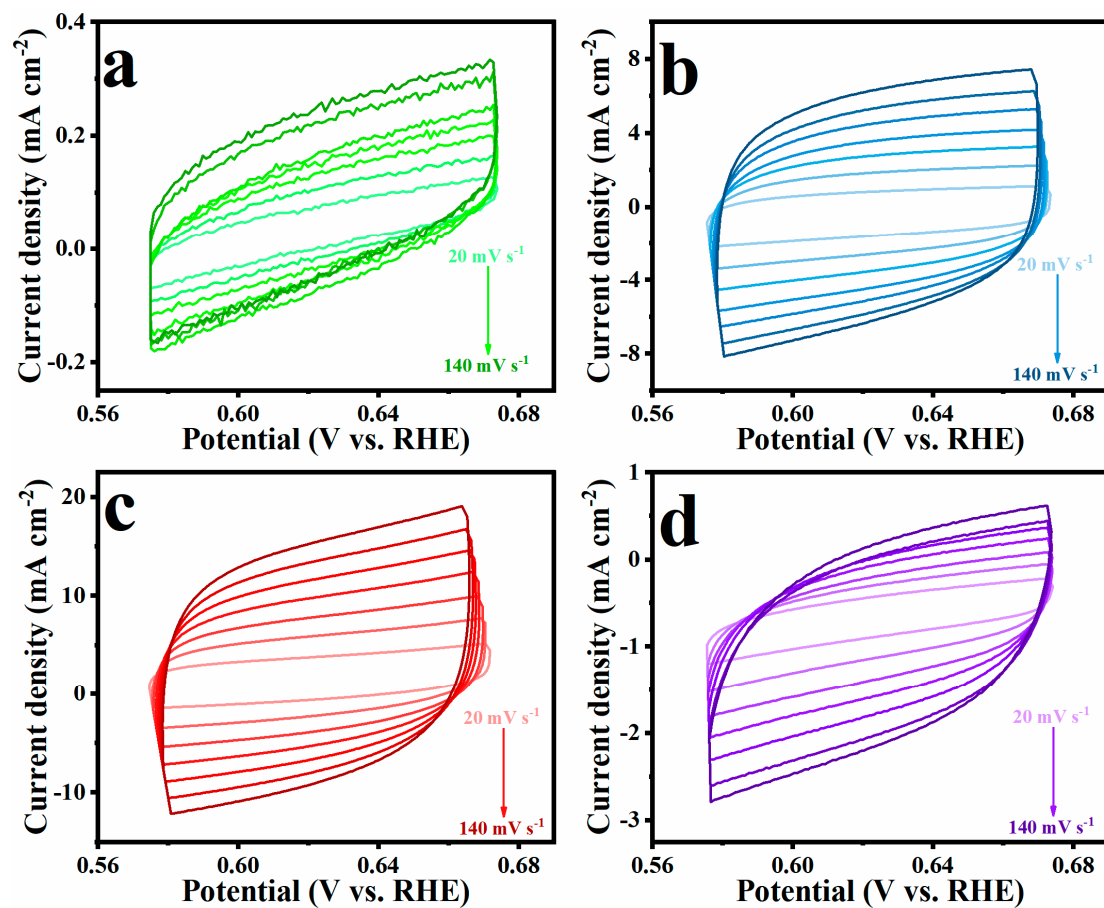

**Figure S5.** Cyclic voltammetry (CVs) curves for HER in a non-faradic current region (potential window at 0.57 - 0.67 V (vs. RHE)) at different scan rates (20, 40, 60, 80, 100, 120 and 140 mV s<sup>-1</sup>) of (a) NFF, (b) LaCoFe/NFF, (c) La<sub>0.9</sub>CoFe/NFF and (d) La<sub>0.8</sub>CoFe/NFF.

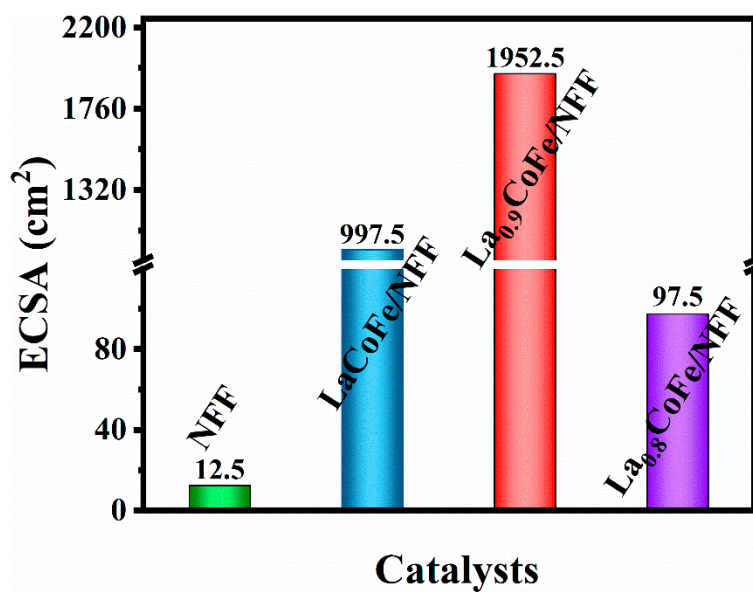

**Figure S6.** Electrochemical active area (ECSA) of HER.



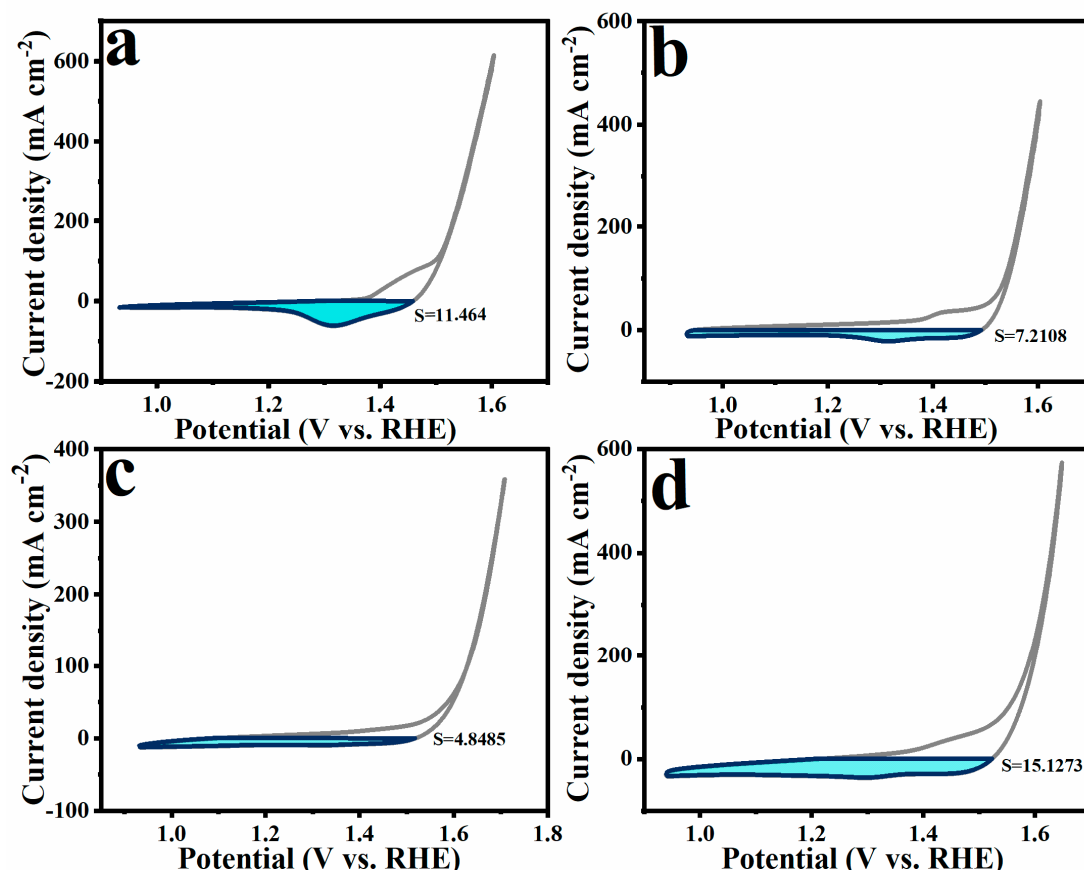

**Figure S7.** Reduction peaks recorded at  $0.2 \text{ V s}^{-1}$ . (a) NFF; (b)  $\text{LaCoFe/NFF}$ ; (c)  $\text{La}_{0.9}\text{CoFe/NFF}$ ; (d)  $\text{La}_{0.8}\text{CoFe/NFF}$ .

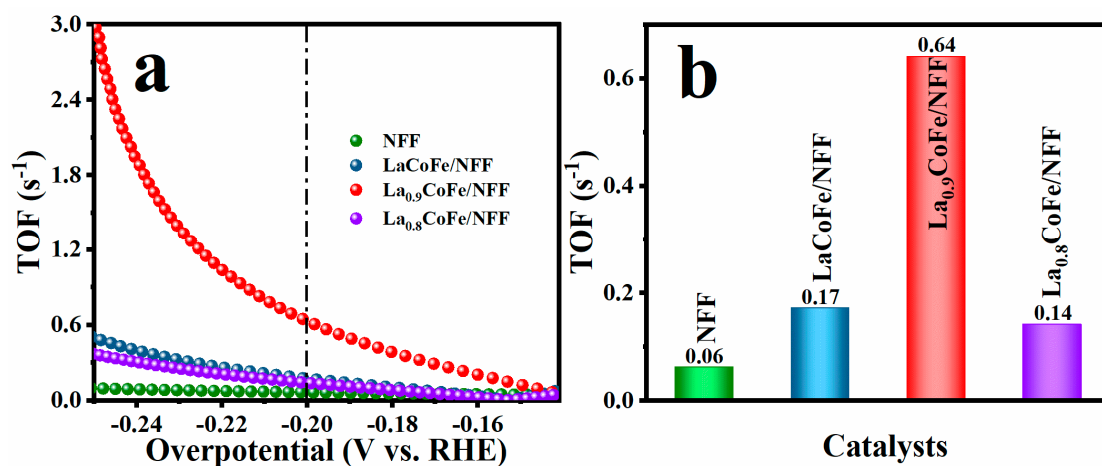

**Figure S8.** (a) The potential dependent TOF curves of the NFF,  $\text{LaCoFe/NFF}$ ,  $\text{La}_{0.9}\text{CoFe/NFF}$  and  $\text{La}_{0.8}\text{CoFe/NFF}$ ; (b) TOF values at the overpotential of 200 mV of the corresponding samples.

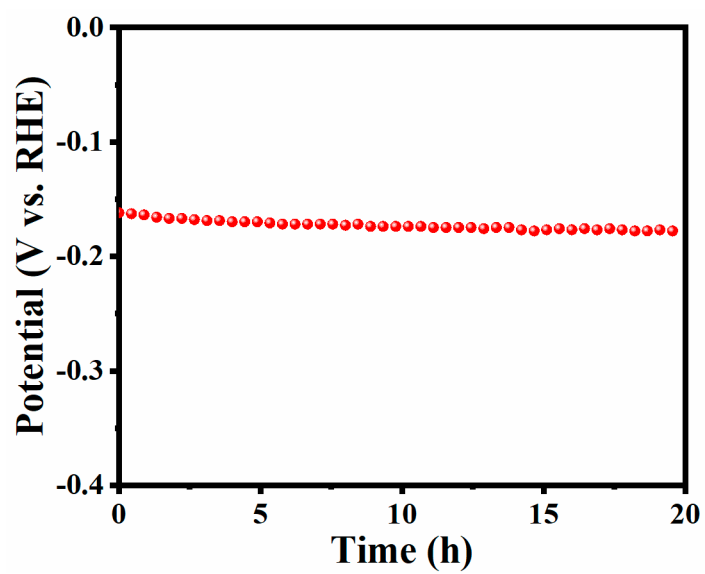

**Figure S9.** Chronopotentiometry test for 20 h at  $-10 \text{ mA cm}^{-2}$  of electrocatalysts.

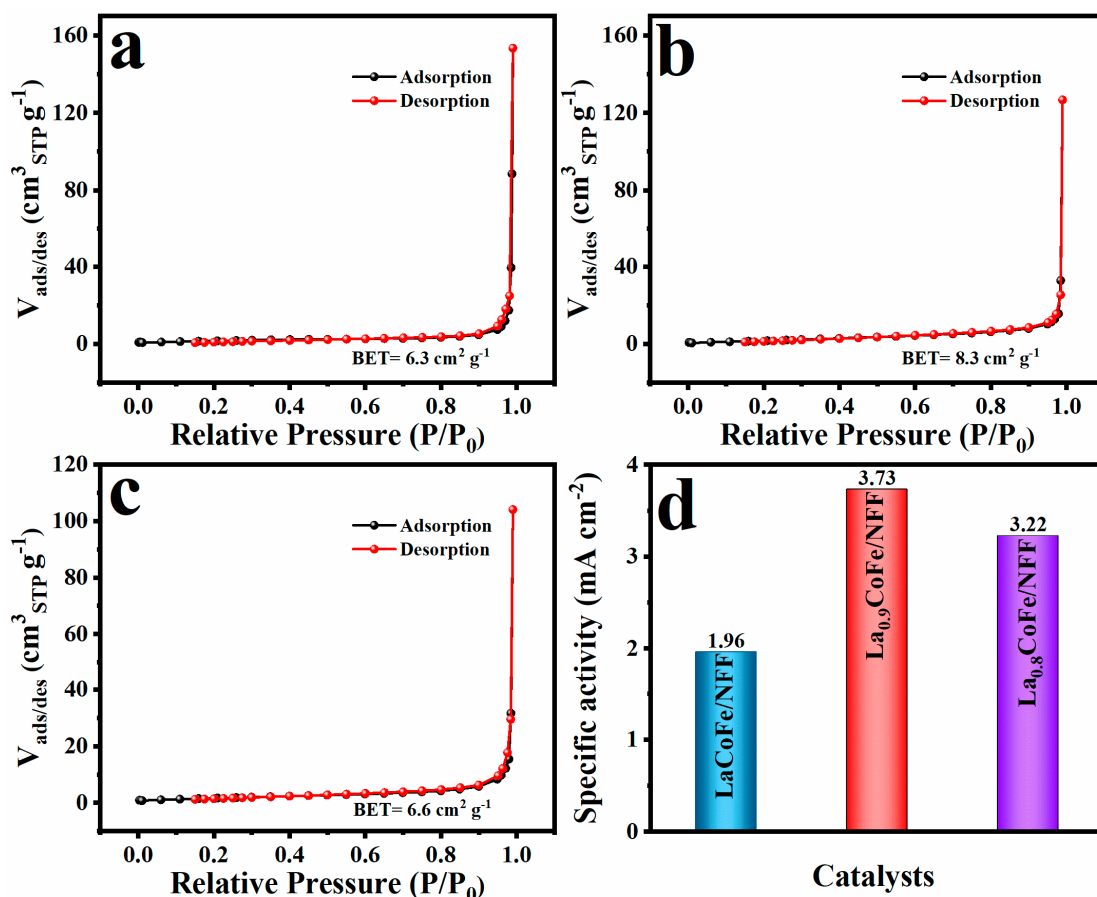

**Figure S10.** BET surface area calculations from the  $N_2$  absorption-desorption isotherms.

(a)  $\text{LaCoFe/NFF}$ , (b)  $\text{La}_{0.9}\text{CoFe/NFF}$  and (c)  $\text{La}_{0.8}\text{CoFe/NFF}$ ; (d) Specific activity of  $\text{LaCoFe/NFF}$ ,  $\text{La}_{0.9}\text{CoFe/NFF}$  and  $\text{La}_{0.8}\text{CoFe/NFF}$  recorded at an overpotential of 200 mV.

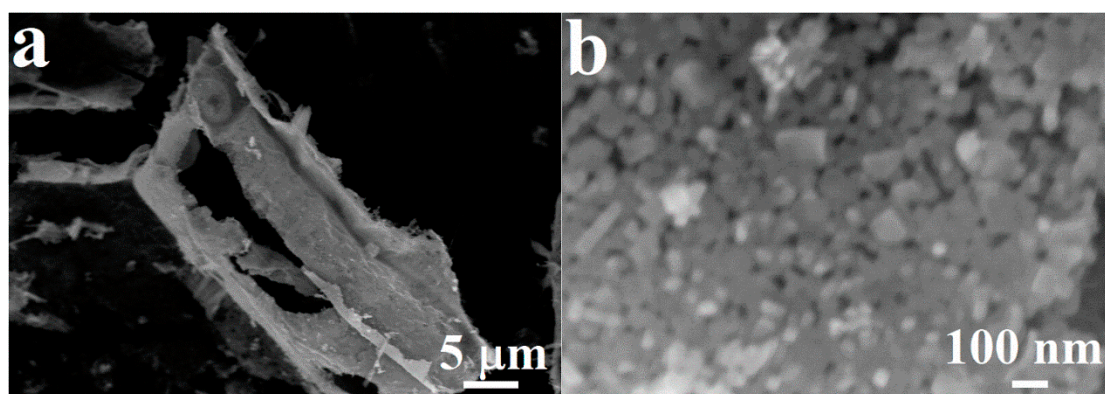

**Figure S11.** SEM images of  $\text{La}_{0.9}\text{CoFe/NFF}$  after HER long-term tests in 1 M KOH.

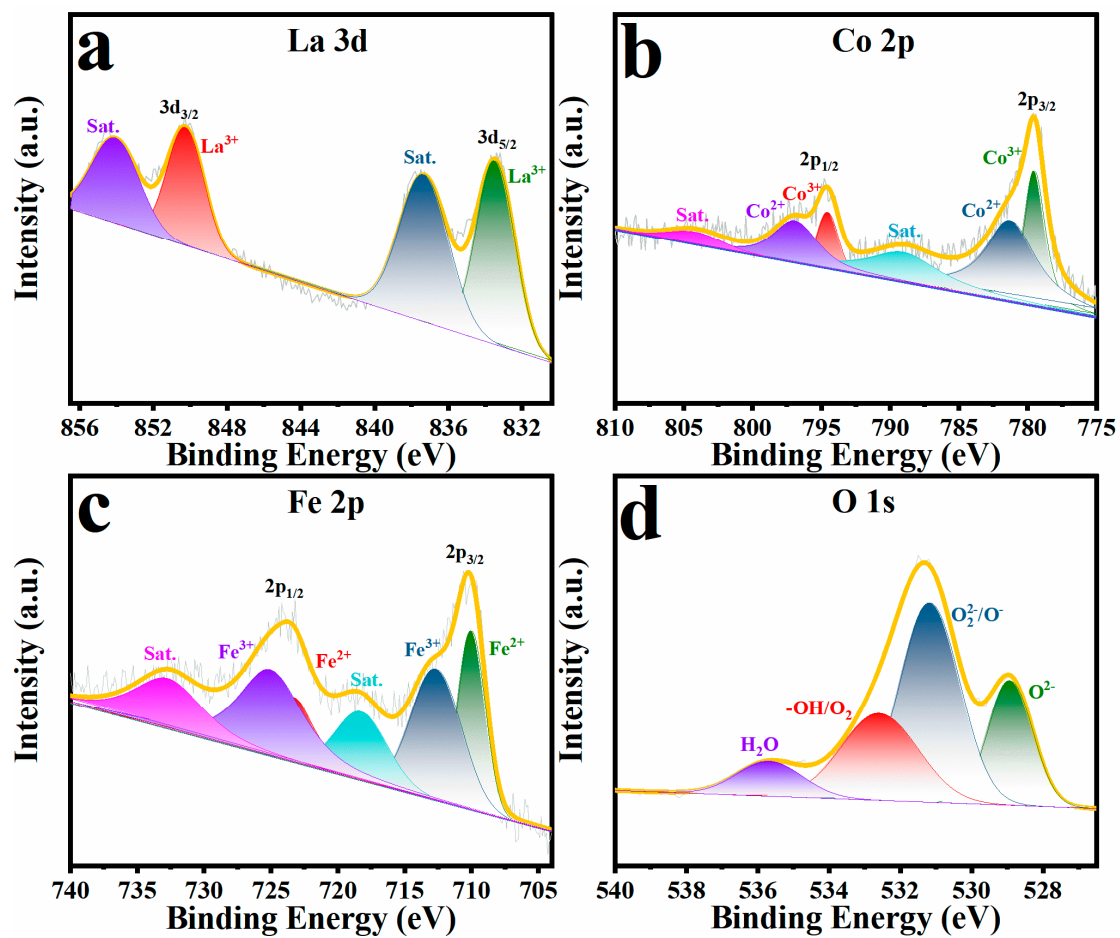

**Figure S12.** XPS spectra of (a) La 3d, (b) Co 2p (c) Fe 2p and (d) O 1s of  $\text{La}_{0.9}\text{CoFe}/\text{NFF}$  after HER tests in 1M KOH.

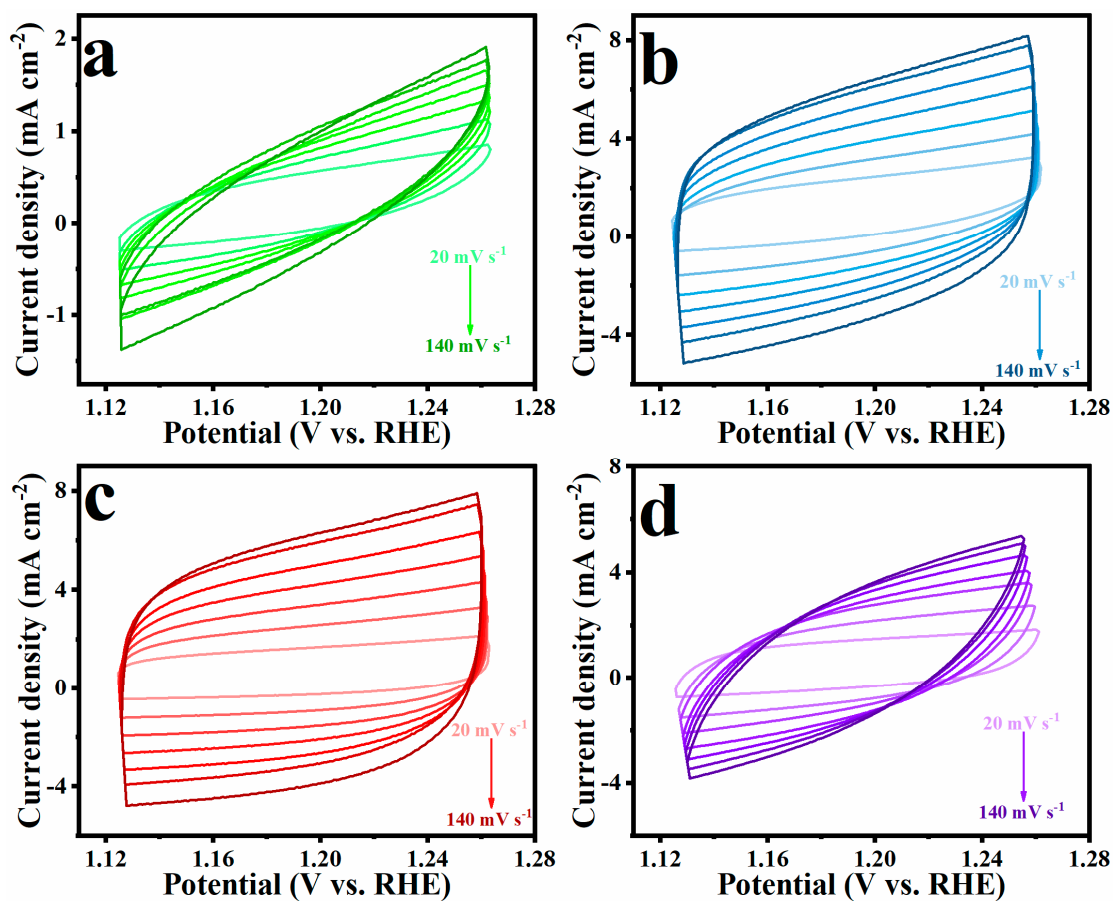

**Figure S13.** Cyclic voltammetry (CVs) curves for OER in a non-faradic current region (potential window at 1.12 - 1.26 V (vs. RHE)) at different scan rates (20, 40, 60, 80, 100, 120 and 140  $\text{mV s}^{-1}$ ) of (a) NFF, (b)  $\text{LaCoFe/NFF}$ , (c)  $\text{La}_{0.9}\text{CoFe/NFF}$  and (d)  $\text{La}_{0.8}\text{CoFe/NFF}$ .

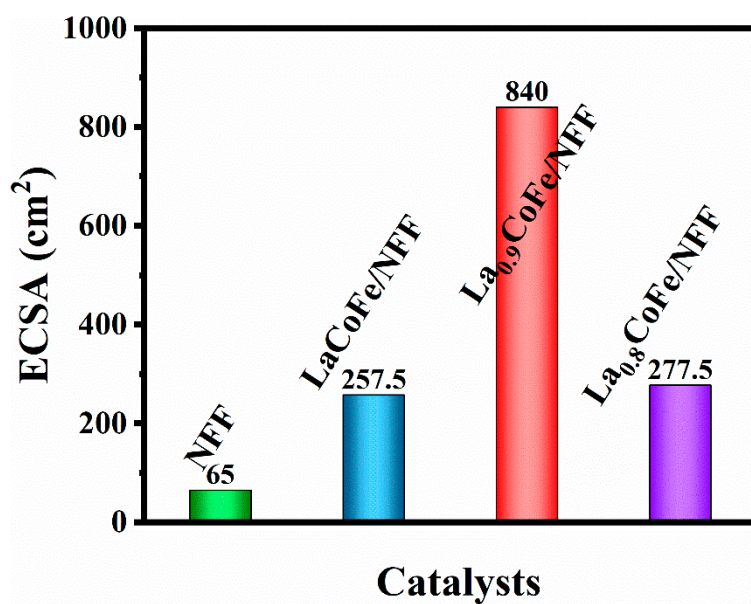

**Figure S14.** Electrochemical active area (ECSA) of OER.



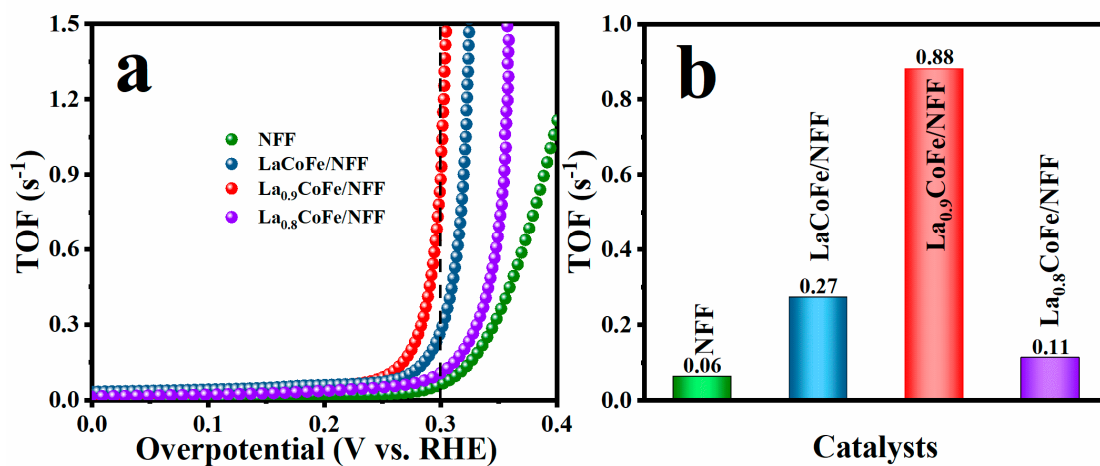

**Figure S15.** (a) The potential dependent TOF curves of the NFF, LaCoFe/NFF, La<sub>0.9</sub>CoFe/NFF and La<sub>0.8</sub>CoFe/NFF; (b) TOF values at the overpotential of 300 mV of the corresponding samples.

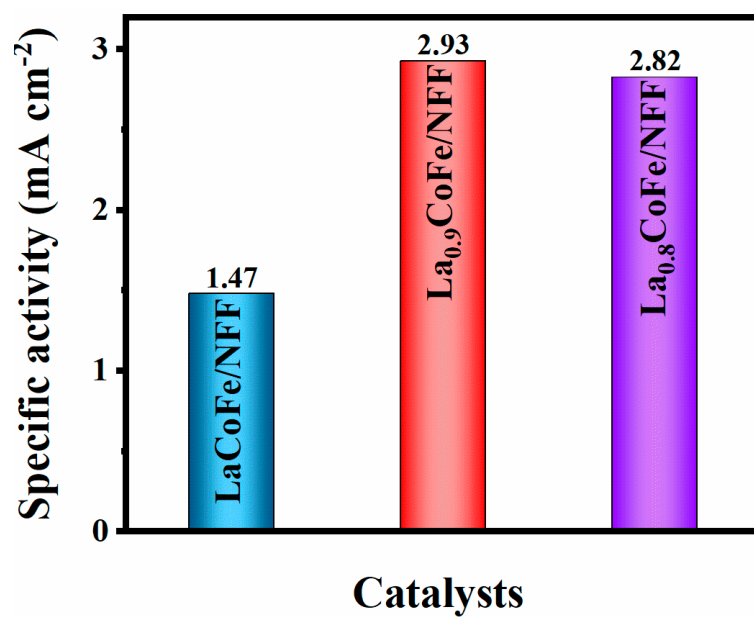

**Figure S16.** Specific activity of **LaCoFe/NFF**, **La<sub>0.9</sub>CoFe/NFF** and **La<sub>0.8</sub>CoFe/NFF** recorded at an overpotential of 270 mV.

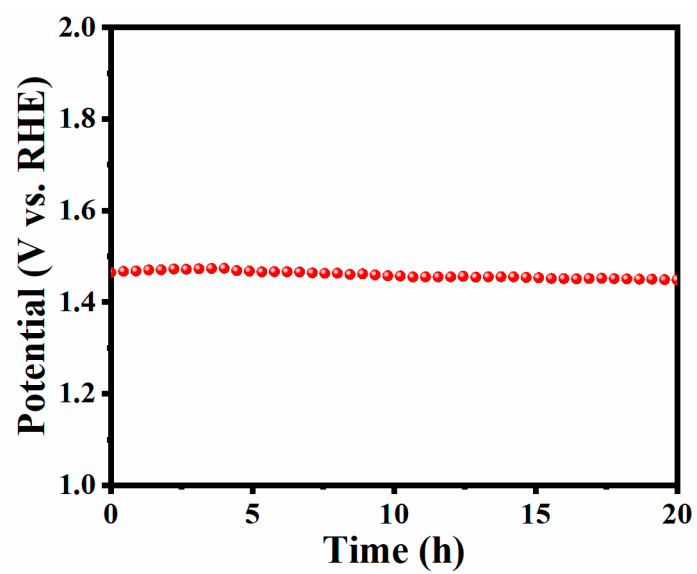

**Figure S17.** Chronopotentiometry test for 20 h at  $10 \text{ mA cm}^{-2}$  of electrocatalysts.

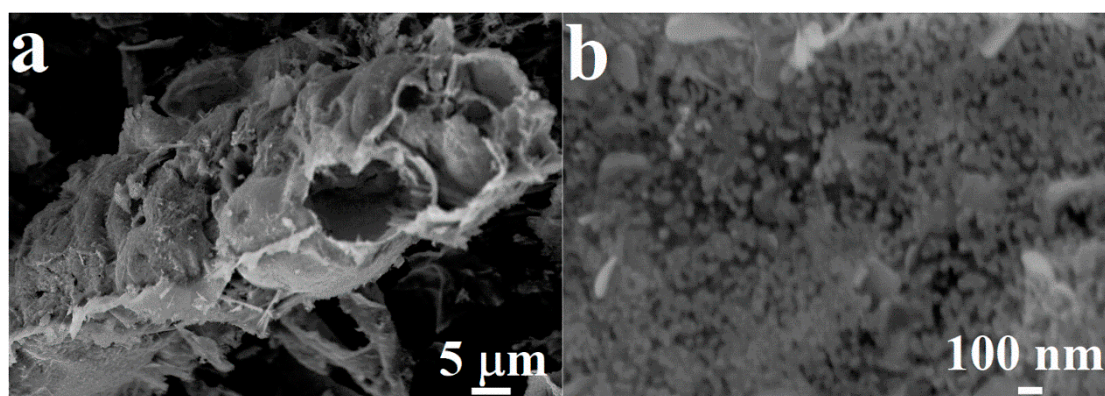

**Figure S18.** SEM images of  $\text{La}_{0.9}\text{CoFe/NFF}$  after OER long-term tests in 1 M KOH.

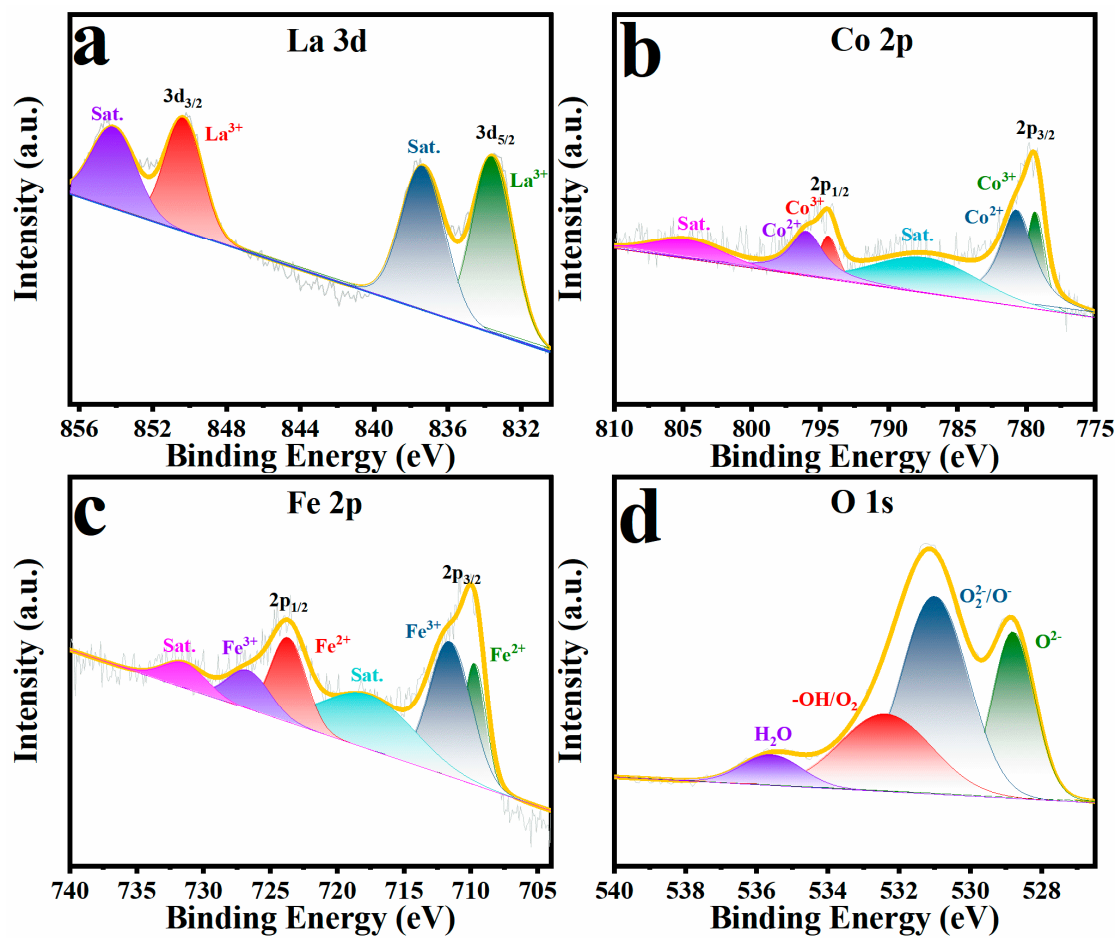

**Figure S19.** XPS spectra of (a) La 3d, (b) Co 2p (c) Fe 2p and (d) O 1s of  $\text{La}_{0.9}\text{CoFe/NFF}$  after long-term OER tests in 1M KOH.

**Table S1.** XPS Peak Positions (Binding Energy, eV) Obtained for All the  $\text{La}_x\text{CoFe/NFF}$  catalysts.

| <b>XPS peaks</b>           | <b><math>\text{LaCoFe/NFF}</math></b> | <b><math>\text{La}_{0.9}\text{CoFe/NFF}</math></b> | <b><math>\text{La}_{0.8}\text{CoFe/NFF}</math></b> |
|----------------------------|---------------------------------------|----------------------------------------------------|----------------------------------------------------|
| <b>La 3d<sub>5/2</sub></b> | 833.4                                 | 833.4                                              | 832.6                                              |
|                            | 837.1                                 | 837.3                                              | 837.1                                              |
| <b>La 3d<sub>3/2</sub></b> | 850.2                                 | 850.2                                              | 850.1                                              |
|                            | 854.0                                 | 854.0                                              | 854.1                                              |
| <b>Co 2p<sub>3/2</sub></b> | 779.3                                 | 778.5                                              | 779.5                                              |
|                            | 780.6                                 | 781.2                                              | 781.8                                              |
|                            | 786.9                                 | 790.0                                              | 788.9                                              |
| <b>Co 2p<sub>1/2</sub></b> | 784.4                                 | 794.5                                              | 794.4                                              |
|                            | 796.0                                 | 796.8                                              | 796.7                                              |
|                            | 804.5                                 | 804.1                                              | 802.2                                              |
| <b>Fe 2p<sub>3/2</sub></b> | 790.4                                 | 709.9                                              | 709.4                                              |
|                            | 711.5                                 | 712.6                                              | 711.8                                              |
|                            | 717.6                                 | 718.2                                              | 717.7                                              |
| <b>Fe 2p<sub>1/2</sub></b> | 723.6                                 | 723.2                                              | 723.5                                              |
|                            | 726.6                                 | 725.0                                              | 725.6                                              |
|                            | 731.4                                 | 732.6                                              | 732.1                                              |
| <b>O 1s</b>                | 528.8                                 | 528.9                                              | 528.8                                              |
|                            | 531.0                                 | 531.1                                              | 831.1                                              |
|                            | 532.3                                 | 532.5                                              | 532.3                                              |
|                            | 535.6                                 | 535.7                                              | 536.8                                              |

**Table S2.** Comparison of HER performance of **La<sub>0.9</sub>CoFe/NFF** with other perovskite electrocatalysts reported previously.

| Catalyst                                                                              | Electrolyte    | Tafel slope<br>(mVdec <sup>-1</sup> ) | $\eta$ (mV) @ j=10<br>mA cm <sup>-2</sup> | $\eta$ (mV) @ j=100<br>mA cm <sup>-2</sup> | Reference        |
|---------------------------------------------------------------------------------------|----------------|---------------------------------------|-------------------------------------------|--------------------------------------------|------------------|
| <b>La<sub>0.9</sub>CoFe/NFF</b>                                                       | <b>1 M KOH</b> | <b>80.8</b>                           | <b>160.5</b>                              | <b>241</b>                                 | <b>This work</b> |
| LCC4                                                                                  | 1 M NaOH       | 144                                   | 305                                       | NA                                         | 1                |
| CoP-PBSCF                                                                             | 1 M KOH        | 93.8                                  | 240                                       | NA                                         | 2                |
| C-NSCFNb                                                                              | 1 M KOH        | 133                                   | 470                                       | NA                                         | 4                |
| Ca <sub>2</sub> FeCoO <sub>6-<math>\delta</math></sub>                                | 1 M KOH        | 105                                   | 250                                       | NA                                         | 17               |
| LSFCP-55                                                                              | 1 M KOH        | 119.2                                 | 280                                       | 560                                        | 45               |
| La <sub>0.7</sub> Y <sub>0.3</sub> Co <sub>0.5</sub> Ni <sub>0.5</sub> O <sub>3</sub> | 1 M KOH        | 156                                   | 400                                       | NA                                         | 46               |
| BaNiO <sub>3</sub>                                                                    | 1 M KOH        | 427                                   | 216                                       | ~670                                       | 47               |
| BaSrCoMoO <sub>6</sub>                                                                | 1 M KOH        | 160                                   | 325                                       | NA                                         | 48               |
| S9                                                                                    | 1 M KOH        | 212                                   | 451                                       | ~700                                       | 49               |
| LCO(110)                                                                              | 1 M KOH        | 96.1                                  | 390                                       | NA                                         | 50               |
| LCO/MoS <sub>2</sub> -4                                                               | 1 M KOH        | 78                                    | 241                                       | NA                                         | 51               |
| STFP-1                                                                                | 2 M KOH        | 77                                    | 182.4                                     | NA                                         | 52               |
| STFN/CNT-700                                                                          | 0.1 M KOH      | 116                                   | 320                                       | NA                                         | 53               |
| AC-SrIrO <sub>3</sub>                                                                 | 0.1 M KOH      | 49                                    | 370                                       | NA                                         | 54               |
| Co(OH) <sub>2</sub> /SFM-NF                                                           | 0.1 M KOH      | 77                                    | 312                                       | NA                                         | 55               |
| r-LSCN-P                                                                              | 0.1 M KOH      | 105                                   | 339                                       | NA                                         | 56               |

NA: Not applicable since not reported.

**Table S3.** Comparison of OER performance of **La<sub>0.9</sub>CoFe/NFF** with other perovskite electrocatalysts reported previously.

| Catalyst                                                                              | Electrolyte    | Tafel slope<br>(mVdec <sup>-1</sup> ) | $\eta$ (mV) @ j=10<br>mA cm <sup>-2</sup> | $\eta$ (mV) @<br>j=100 mA cm <sup>-2</sup> | Reference          |
|---------------------------------------------------------------------------------------|----------------|---------------------------------------|-------------------------------------------|--------------------------------------------|--------------------|
| <b>La<sub>0.9</sub>CoFe/NFF</b>                                                       | <b>1 M KOH</b> | <b>59.1</b>                           | <b>234.7</b>                              | <b>296.1</b>                               | <b>This work</b>   |
| LCC4                                                                                  | 1 M NaOH       | 80                                    | 380                                       | NA                                         | <a href="#">1</a>  |
| CoP-PBSCF                                                                             | 1 M KOH        | 81.5                                  | 340                                       | NA                                         | <a href="#">2</a>  |
| C-NSCFNb                                                                              | 1 M KOH        | 89                                    | 420                                       | NA                                         | <a href="#">4</a>  |
| Ca <sub>2</sub> FeCoO <sub>6-δ</sub>                                                  | 1 M KOH        | 57                                    | 250                                       | NA                                         | <a href="#">17</a> |
| LSFCP-55                                                                              | 1 M KOH        | 53.2                                  | 330                                       | 420                                        | <a href="#">45</a> |
| La <sub>0.7</sub> Y <sub>0.3</sub> Co <sub>0.5</sub> Ni <sub>0.5</sub> O <sub>3</sub> | 1 M KOH        | 188                                   | 338                                       | NA                                         | <a href="#">46</a> |
| BU                                                                                    | 1 M KOH        | 64                                    | 253                                       | 400                                        | <a href="#">47</a> |
| BaSrCoMoO <sub>6</sub>                                                                | 1 M KOH        | 81                                    | 400                                       | NA                                         | <a href="#">48</a> |
| SU                                                                                    | 1 M KOH        | 70                                    | 259                                       | 410                                        | <a href="#">49</a> |
| LSCO(111)                                                                             | 1 M KOH        | 86.9                                  | 289                                       | NA                                         | <a href="#">50</a> |
| LCO/MoS <sub>2</sub> -4                                                               | 1 M KOH        | 62.5                                  | 370                                       | NA                                         | <a href="#">51</a> |
| STFP-1                                                                                | 2 M KOH        | 73                                    | 277.6                                     | 420                                        | <a href="#">52</a> |
| STFN/CNT-700                                                                          | 0.1 M KOH      | 98                                    | 480                                       | NA                                         | <a href="#">53</a> |
| SrIrO <sub>3</sub>                                                                    | 0.1 M KOH      | 55                                    | 300                                       | NA                                         | <a href="#">54</a> |
| Co(OH) <sub>2</sub> /SFM-NF                                                           | 0.1 M KOH      | 71                                    | 387                                       | NA                                         | <a href="#">55</a> |
| r-LSCN-P                                                                              | 0.1 M KOH      | 72.1                                  | 410                                       | NA                                         | <a href="#">56</a> |
| S-LCF                                                                                 | 1 M KOH        | 60                                    | 360                                       | NA                                         | <a href="#">57</a> |

NA: Not applicable since not reported.



**Table S4.** Comparison of Cell voltage of  $\text{La}_{0.9}\text{CoFe/NFF}||\text{La}_{0.9}\text{CoFe/NFF}$  with perovskite electrocatalysts reported previously.

| Catalyst                                                                                                                                       | Electrolyte | Cell Voltage (V) @<br>$j=10 \text{ mA cm}^{-2}$ | Reference |
|------------------------------------------------------------------------------------------------------------------------------------------------|-------------|-------------------------------------------------|-----------|
| $\text{La}_{0.9}\text{CoFe/NFF}  \text{La}_{0.9}\text{CoFe/NFF}$                                                                               | 1 M KOH     | 1.573                                           | This work |
| CoP-PBSCF  CoP-PBSCF                                                                                                                           | 1 M KOH     | 1.69                                            | 2         |
| C-NSCFNb  C-NSCFNb                                                                                                                             | 1 M KOH     | 1.71                                            | 4         |
| LSFCP-55  LSFCP-55                                                                                                                             | 1 M KOH     | 1.57                                            | 45        |
| $\text{La}_{0.7}\text{Y}_{0.3}\text{Co}_{0.5}\text{Ni}_{0.5}\text{O}_3  \text{La}_{0.7}\text{Y}_{0.3}\text{Co}_{0.5}\text{Ni}_{0.5}\text{O}_3$ | 1 M KOH     | 1.63                                            | 46        |
| BU  BU                                                                                                                                         | 1 M KOH     | 1.82                                            | 47        |
| SU  S9                                                                                                                                         | 1 M KOH     | 1.88                                            | 49        |
| STFP01  STFP01                                                                                                                                 | 2 M KOH     | 1.665                                           | 52        |
| STFN/CNT-700  STFN/CNT-700                                                                                                                     | 0.1 M KOH   | 1.8                                             | 53        |
| AC-SrIrO <sub>3</sub>   SrIrO <sub>3</sub>                                                                                                     | 0.1 M KOH   | 1.59                                            | 54        |
| Co(OH) <sub>2</sub>   SMF-NF                                                                                                                   | 0.1 M KOH   | 1.6                                             | 55        |
| r-LSCN-P  r-LSCN-P                                                                                                                             | 0.1 M KOH   | 1.7                                             | 56        |
| S-LCF  S-LCF                                                                                                                                   | 1 M KOH     | 1.67                                            | 57        |

## References

- Hui, J.; Yan, C.; Shi, Y.; Yang, Z. Rare-earth metal multicomponent perovskite as a electrocatalyst for water splitting. *Mater. Lett.* **2023**, 332, 133532. <https://doi.org/10.1016/j.matlet.2022.133532>.
- Junita, J.; Jayalakshmi, D.; Rodney, J.D. Combustion-derived BaNiO<sub>3</sub> nanoparticles as a potential bifunctional electrocatalyst for overall water splitting. *Int. J. Hydrogen Energy* **2023**, 48, 14287–14298. <https://doi.org/10.1016/j.ijhydene.2022.12.291>.
- Karki, S.B.; Andriotis, A.N.; Menon, M.; Ramezanipour, F. Enhancement of Electrocatalytic Activity for both Hydrogen and Oxygen Evolution Reactions of a Perovskite Oxide. *J. Phys. Chem. C* **2022**, 126, 20011–20019. <https://doi.org/10.1021/acs.jpcc.2c05651>.
- Junita, J.; Jayalakshmi, D.; Rodney, J.D. Effect of annealing temperature on the bifunctional electrocatalytic properties of strontium nickelate (SrNiO<sub>3</sub>) nanoparticles for efficient overall water splitting. *Int. J. Hydrogen Energy* **2022**, 47, 30602–30612. <https://doi.org/10.1016/j.ijhydene.2022.07.007>.
- Zhou, Y.-N.; Wang, F.-G.; Zhen, Y.-N.; Nan, J.; Dong, B.; Chai, Y.-M. Crystal facet engineering of perovskite cobaltite with optimized electronic regulation for water splitting. *Sci. China Mater.* **2022**, 65, 2665–2674. <https://doi.org/10.1007/s40843-022-2016-5>.
- Rana, A.K.; Jeong, M.H.; Noh, Y.I.; Park, H.; Baik, J.M.; Choi, K.J. Phase-Tuned MoS<sub>2</sub> and Its Hybridization with Perovskite Oxide as Bifunctional Catalyst: A Rationale for Highly Stable and Efficient Water Splitting. *ACS Appl. Mater. Interfaces* **2022**, 14, 18248–18260. <https://doi.org/10.1021/acsami.1c21425>.
- Sarmad, Q.; Khan, U.M.; Baig, M.M.; Hassan, M.; Butt, F.A.; Khoja, A.H.; Liaquat, R.; Khan, Z.S.; Anwar, M.; Muhammed Ali, S.A. Praseodymium-doped Sr<sub>2</sub>TiFeO<sub>6-δ</sub> double perovskite as a bi-

- functional electrocatalyst for hydrogen production through water splitting. *J. Environ. Chem. Eng.* **2022**, *10*, 107609. <https://doi.org/10.1016/j.jece.2022.107609>.
53. Wu, X.; Yu, J.; Yang, G.; Liu, H.; Zhou, W.; Shao, Z. Perovskite oxide/carbon nanotube hybrid bifunctional electrocatalysts for overall water splitting. *Electrochim. Acta* **2018**, *286*, 47–54. <https://doi.org/10.1016/j.electacta.2018.08.010>.
  54. Yu, J.; Wu, X.; Guan, D.; Hu, Z.; Weng, S.-C.; Sun, H.; Song, Y.; Ran, R.; Zhou, W.; Ni, M.; et al. Monoclinic SrIrO<sub>3</sub>: An Easily Synthesized Conductive Perovskite Oxide with Outstanding Performance for Overall Water Splitting in Alkaline Solution. *Chem. Mater.* **2020**, *32*, 4509–4517. <https://doi.org/10.1021/acs.chemmater.0c00149>.
  55. He, B.; Tan, K.; Gong, Y.; Wang, R.; Wang, H.; Zhao, L. Coupling amorphous cobalt hydroxide nanoflakes on Sr<sub>2</sub>Fe<sub>1.5</sub>Mo<sub>0.5</sub>O<sub>5+δ</sub> perovskite nanofibers to induce bifunctionality for water splitting. *Nanoscale* **2020**, *12*, 9048–9057. <https://doi.org/10.1039/d0nr00848f>.
  56. Wang, Y.; Wang, Z.; Jin, C.; Li, C.; Li, X.; Li, Y.; Yang, R.; Liu, M. Enhanced overall water electrolysis on a bifunctional perovskite oxide through interfacial engineering. *Electrochim. Acta* **2019**, *318*, 120–129. <https://doi.org/10.1016/j.electacta.2019.06.073>.
  57. Tang, L.; Chen, Z.; Zuo, F.; Hua, B.; Zhou, H.; Li, M.; Li, J.; Sun, Y. Enhancing perovskite electrocatalysis through synergistic functionalization of B-site cation for efficient water splitting. *Chem. Eng. J.* **2020**, *401*, 126082. <https://doi.org/10.1016/j.cej.2020.126082>.
